# Supplementary material
Source: HighWire-hosted journal article supplement (https://cmaj.ca/highwire/filestream/150661/field_highwire_adjunct_files/6/231419-res-7-at.pdf)
Supplement: 231419-res-7-at.pdf [file 231419-res-7-at.pdf]

**Appendix VII:** Top 10 diagnoses associated with palliative care assessments conducted by a physician for decedents with and without OUD

| No OUD (n=668,640)                  | %   | OUD (n=11,200)                                                        | %   |
|-------------------------------------|-----|-----------------------------------------------------------------------|-----|
| Malignant neoplasm - bronchus, lung | 9.3 | Malignant neoplasm - bronchus, lung                                   | 8.3 |
| Other malignant neoplasms           | 6.3 | Other malignant neoplasms                                             | 5.3 |
| Senile dementia, presenile dementia | 4.7 | Cirrhosis of the liver (e.g., alcoholic cirrhosis, biliary cirrhosis) | 3.4 |
| Congestive heart failure            | 4.5 | Septicemia, blood poisoning                                           | 3.4 |
| Malignant neoplasm - pancreas       | 3.0 | Pneumonia - all types                                                 | 2.7 |
| Malignant neoplasm - female breast  | 2.9 | Diseases of the digestive system                                      | 2.5 |
| Pneumonia - all types               | 2.8 | Other ill-defined conditions                                          | 2.4 |
| Large intestine - excluding rectum  | 2.7 | Congestive heart failure                                              | 2.3 |
| Other ill-defined conditions        | 2.7 | Malignant neoplasm - pancreas                                         | 2.1 |
| Malignant neoplasm - prostate       | 2.2 | Other chronic obstructive pulmonary disease                           | 2.1 |
